# Supplementary material for: Still no single gold standard for using cementless femoral stems routinely in total hip arthroplasty
Source: PubMed Central journal article supplement — Arthroplast Today. 2016 Sep 15;2(4):211–8. doi: 10.1016/j.artd.2016.02.001 (PMC5247516; doi:10.1016/j.artd.2016.02.001), 2016-09-15
Supplement: mmc2.pdf [file mmc2.pdf]

# CONFLICT OF INTEREST STATEMENT

## *The Journal of Arthroplasty*

(Adopted from the American Academy of Orthopaedic Surgeons disclosure statement)

The following form **must be filled out completely and submitted by each author (example, 6 authors, 6 forms). If no discloser is required, please write/type "none" at the end of each sentence.**

Are we using cementless femoral stems too routinely in total hip arthroplasty? A systematic review – no single "gold standard"

Manuscript Title

1. Royalties from a company or supplier (The following conflicts were disclosed)
  - DePuy (Johnson and Johnson)
2. Speakers bureau/paid presentations for a company or supplier (The following conflicts were disclosed)
  - DePuy (Johnson and Johnson), Stryker, Medtronic
- 3A. Paid employee for a company or supplier (The following conflicts were disclosed)
- 3B. Paid consultant for a company or supplier (The following conflicts were disclosed)
  - DePuy Johnson and Johnson), Stryker, Medtronic
- 3C. Unpaid consultants for a company or supplier (The following conflicts were disclosed)
4. Stock or stock options in a company or supplier (The following conflicts were disclosed)
  - Invuity
5. Research support from a company or supplier as a Principal Investigator (The following conflicts were disclosed)
6. Other financial or material support from a company or supplier (The following conflicts were disclosed)
7. Royalties, financial or material support from publishers (The following conflicts were disclosed)
8. Medical/Orthopaedic publications editorial/governing board (The following conflicts were disclosed)
9. Board member/committee appointments for a society (The following conflicts were disclosed)
  - Board of Directors AAHKS

**Each author must sign AND print or type his/her name, date and submit a separate form**

In addition, one BLINDED Conflict of Interest form (no author names used) should be submitted per manuscript with all author disclosures.

Joseph T. Moskal, M.D.

Author Name (Print or Type)

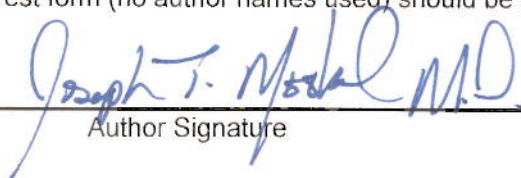

Author Signature

September 4, 2015

Date
